# Supplementary material for: Reevaluation of the Systematic Status of Branchinotogluma (Annelida, Polynoidae), with the Establishment of Two New Species
Source: Hindawi journal article supplement (doi:10.1155/2023/1490800), 2023-01-11
Supplement: f1 [file 1490800.f1.docx]

**SUPPLEMENTARY MATERIAL**


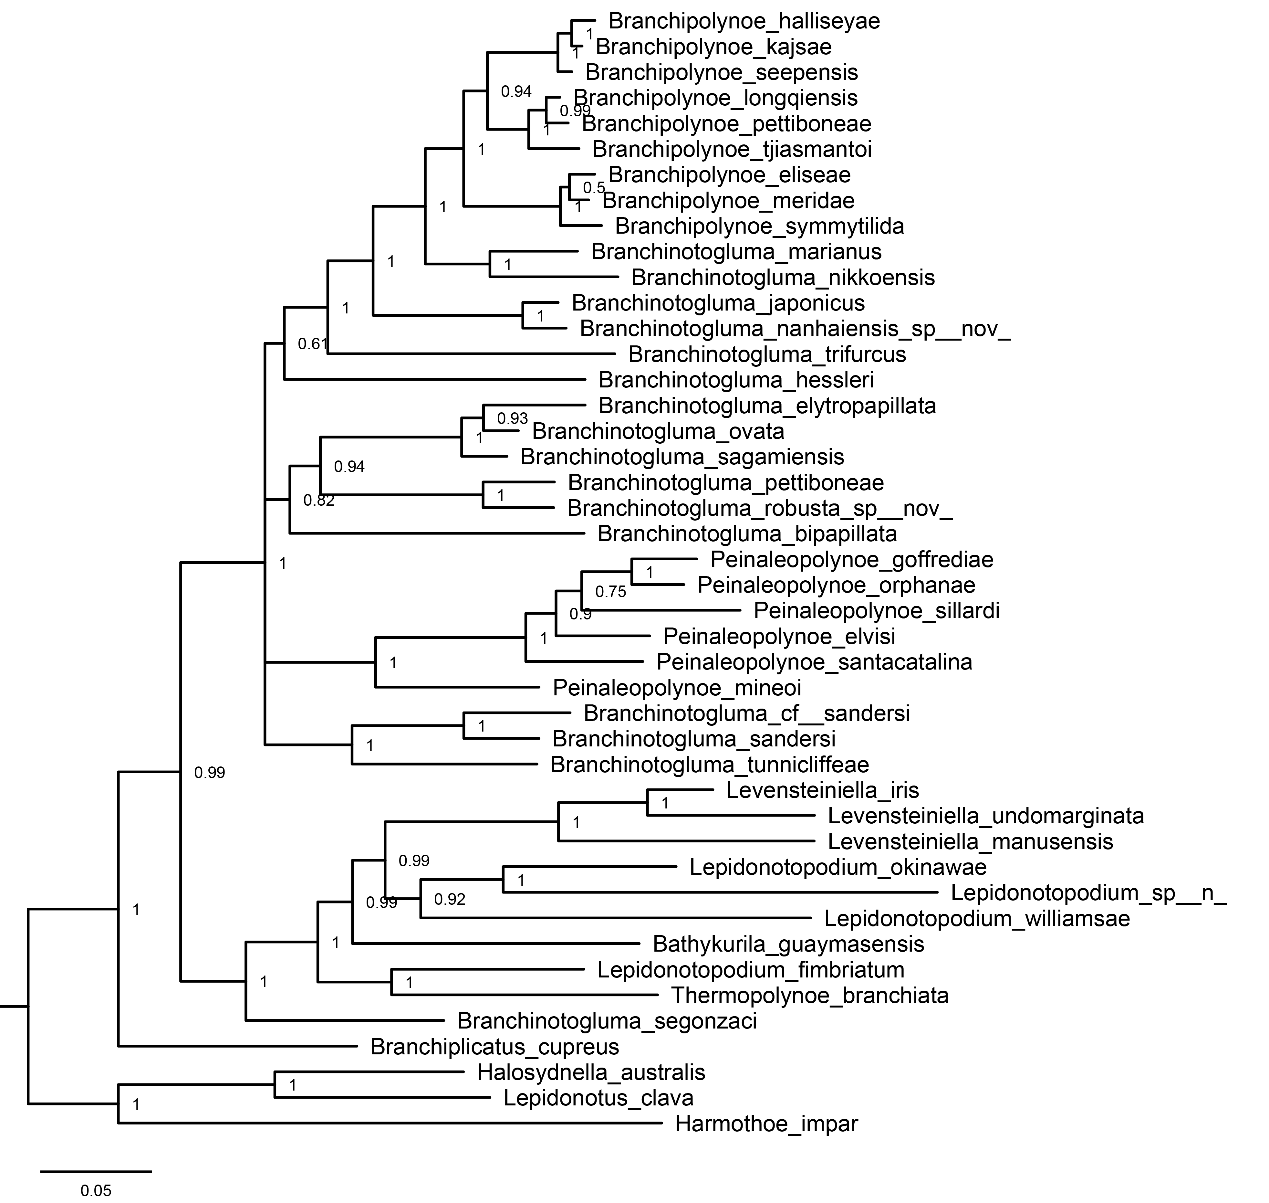


**Figure S1.** Bayesian inference (BI) tree reconstructed inferred from concatenated sequences (COI, 16S, 18S and 28S) of *Branchinotogluma* and related genera.


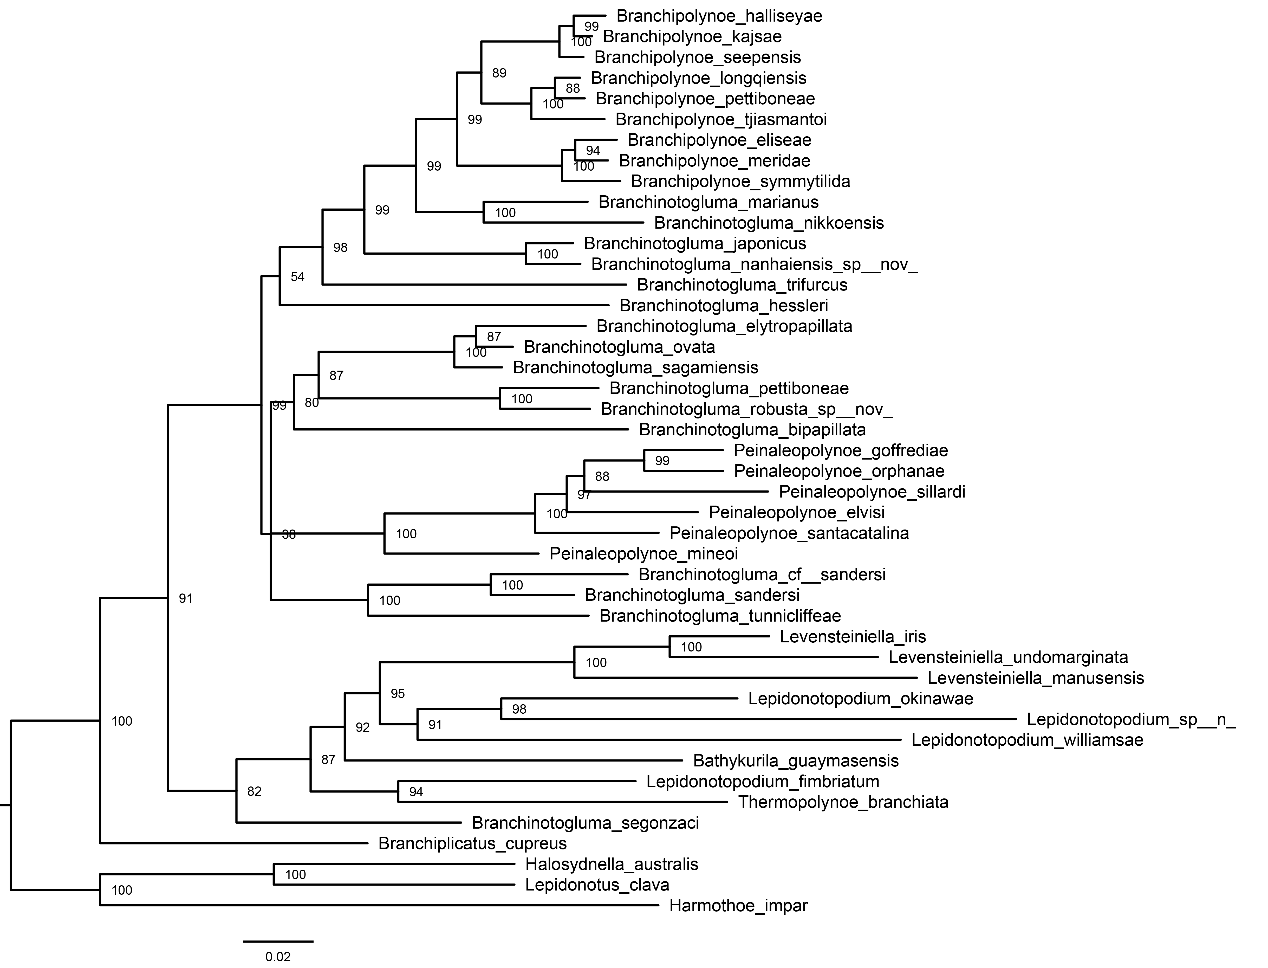


**Figure S2.** Maximum likelihood (ML) tree reconstructed inferred from concatenated sequences (COI, 16S, 18S and 28S) of *Branchinotogluma* and related genera.

**Table S1. Details of primers used for PCR and sequencing with original reference**

| **Gene** | **Primer** | **Primer sequence (5' - 3')** | **Reference** | **Primers pairs** | **Annealing Temperature (°C)** | **Extension Length (s)** |
| --- | --- | --- | --- | --- | --- | --- |
| COI | LCO1490 | GGTCAACAAATCATAAAGATATTGG | Folmer et al. (1994) | LCO1490/HCO2198 | 46 | 40 |
|  | HCO2198 | TAAACTTCAGGGTGACCAAAAAATCA | Folmer et al. (1994) |  |  |
|  | LoboF1 | KBTCHACAAAYCAYAARGAYATHGG | Lobo et al. (2013) | LoboF1/LoboR1 |  |  |
|  | LoboR1 | TAAACYTCWGGRTGWCCRAARAAYCA | Lobo et al. (2013) |  |  |
| 16S | 16SarL | CGCCTGTTTATCAAAAACAT | Palumbi (1996) | 16SarL/16SbrH | 55 | 90 |
|  | 16SbrH | CCGGTCTGAACTCAGATCACGT | Palumbi (1996) |  |  |
|  | Ann16SF | GCGGTATCCTGACCGTRCWAAGGTA | Sjölin et al. (2005) | Ann16SF/Ann16SR |  |  |
|  | Ann16SR | TCCTAAGCCAACATCGAGGTGCCAA | Sjölin et al. (2005) |  |  |
| 18S | 18SA | AYCTGGTTGATCCTGCCAGT | Medlin et al. (1988) | 18SA/18SB | 52 | 90 |
|  | 18SB | ACCTTGTTACGACTTTTACTTCCTC | Nygren and Sundberg (2003) |  |  |
|  | 620F | TAAAGYTGYTGCAGTTAAA | Nygren and Sundberg (2003) | 620F/18SB |  |  |
| 28S | 28S D1_F | ACCC(GC)CTGAA(CT)TTAAGCA T | Brown et al. 1999 | 28S D1_F/28S D1_R | 50 | 60 |
|  | 28S D1_R | AACTCTCTC(AC)TTCA(AG)AGTTC | Brown et al. 1999 |  |  |
|  | 28SD3 | GACGATCGATTTGCACGTCA | Vonnemann et al. (2005) | 28S D1_F/28SD3 | |  |

**REFERENCES**

Brown, S., Rouse, G., Hutchings, P., & Colgan, D. (1999). Assessing the usefulness of histone H3, U2 snRNA and 28S rDNA in analyses of polychaete relationships. *Australian Journal of Zoology,* 47, 499–516. https://doi.org/10.1071/zo99026

Folmer, O., Black, M., Hoeh, W., Lutz, R., & Vrijenhoek, R. (1994). DNA primers for amplification of mitochondrial cytochrome c oxidase subunit I from diverse metazoan invertebrates. *Molecular Marine Biology and Biotechnology,* 3(5), 294–299.

Lobo, J., Costa, P. M., Teixeira, M. A. L., Ferreira, M. S. G., Costa, M. H., & Costa, F. O. (2013). Enhanced primers for amplification of DNA barcodes from a broad range of marine metazoans. *BMC ecology,* 13, 34. https://doi.org/10.1186/1472-6785-13-34

Medlin, L., Elwood, H. J., Stickel, S., & Sogin, M. L. (1988). The characterization of enzymatically amplified eukaryotic 16S-like rRNA-coding regions. *Gene,* 71, 491–499. https://doi.org/10.1016/0378-1119(88)90066-2

Nygren, A., & Sundberg, P. (2003). Phylogeny and evolution of reproductive modes in Autolytinae (Syllidae, Annelida). *Molecular Phylogenetics and Evolution,* 29(2), 235–249. https://doi.org/10.1016/S1055-7903(03)00095-2

Palumbi, S. R. (1996). Nucleic acids II: The polymerase chain reaction. In: Hillis, D. M., Moritz, C., & Mable, B. K., eds. *Molecular Systematics* (2nd ed.). Sinauer Associates, Inc, Sunderland, 205–247.

Sjölin, E., Erséus, C., & Källersjö, M. (2005). Phylogeny of Tubificidae (Annelida, Clitellata) based on mitochondrial and nuclear sequence data. *Molecular Phylogenetics and Evolution,* 35(2), 431–441. https://doi.org/10.1016/j.ympev.2004.12.018

Vonnemann, V., Schrodl, M., Klussmann-Kolb, A., & Wagele, H. (2005). Reconstruction of the phylogeny of the Opisthobranchia (Mollusca: Gastropoda) by means of 18S and 28S rRNA gene sequences. *Journal of Molluscan Studies,* 71(2), 113–125. https://doi.org/10.1093/mollus/eyi014

**Table S2. Mean interspecific pairwise distances for *Branchinotogluma* COI data based on the Kimura 2-parameter model. The intraspecific COI distances are shown on the diagonal.**

|  |  | 1 | 2 | 3 | 4 | 5 | 6 | 7 | 8 | 9 | 10 | 11 | 12 | 13 | 14 | 15 | 16 |
| --- | --- | --- | --- | --- | --- | --- | --- | --- | --- | --- | --- | --- | --- | --- | --- | --- | --- |
| 1 | *Branchinotogluma bipapillata* | – |  |  |  |  |  |  |  |  |  |  |  |  |  |  |  |
| 2 | *Branchinotogluma* cf. *sandersi* | 0.246 | – |  |  |  |  |  |  |  |  |  |  |  |  |  |  |
| 3 | *Branchinotogluma elytropapillata* | 0.225 | 0.223 | – |  |  |  |  |  |  |  |  |  |  |  |  |  |
| 4 | *Branchinotogluma hessleri* | 0.262 | 0.222 | 0.202 | – |  |  |  |  |  |  |  |  |  |  |  |  |
| 5 | *Branchinotogluma japonicus* | 0.244 | 0.280 | 0.264 | 0.242 | 0.002 |  |  |  |  |  |  |  |  |  |  |  |
| 6 | *Branchinotogluma marianus* | 0.228 | 0.220 | 0.243 | 0.244 | 0.216 | – |  |  |  |  |  |  |  |  |  |  |
| 7 | *Branchinotogluma nanhaiensis* | 0.236 | 0.235 | 0.250 | 0.218 | 0.088 | 0.216 | 0.000 |  |  |  |  |  |  |  |  |  |
| 8 | *Branchinotogluma nikkoensis* | 0.222 | 0.226 | 0.238 | 0.251 | 0.212 | 0.167 | 0.207 | – |  |  |  |  |  |  |  |  |
| 9 | *Branchinotogluma ovata* | 0.238 | 0.202 | 0.084 | 0.230 | 0.247 | 0.209 | 0.223 | 0.221 | – |  |  |  |  |  |  |  |
| 10 | *Branchinotogluma pettiboneae* | 0.257 | 0.238 | 0.223 | 0.246 | 0.265 | 0.235 | 0.258 | 0.244 | 0.223 | 0.001 |  |  |  |  |  |  |
| 11 | *Branchinotogluma robusta* | 0.238 | 0.252 | 0.233 | 0.198 | 0.262 | 0.235 | 0.239 | 0.253 | 0.235 | 0.150 | 0.004 |  |  |  |  |  |
| 12 | *Branchinotogluma sagamiensis* | 0.239 | 0.214 | 0.102 | 0.211 | 0.245 | 0.191 | 0.222 | 0.224 | 0.084 | 0.229 | 0.228 | – |  |  |  |  |
| 13 | *Branchinotogluma sandersi* | 0.246 | 0.182 | 0.223 | 0.226 | 0.251 | 0.219 | 0.245 | 0.225 | 0.207 | 0.255 | 0.253 | 0.215 | – |  |  |  |
| 14 | *Branchinotogluma segonzaci* | 0.246 | 0.223 | 0.207 | 0.233 | 0.193 | 0.217 | 0.183 | 0.226 | 0.202 | 0.255 | 0.247 | 0.164 | 0.210 | – |  |  |
| 15 | *Branchinotogluma trifurcus* | 0.223 | 0.204 | 0.243 | 0.214 | 0.258 | 0.200 | 0.240 | 0.223 | 0.230 | 0.236 | 0.213 | 0.213 | 0.243 | 0.218 | – |  |
| 16 | *Branchinotogluma tunnicliffeae* | 0.219 | 0.224 | 0.224 | 0.250 | 0.263 | 0.257 | 0.248 | 0.261 | 0.229 | 0.282 | 0.247 | 0.229 | 0.235 | 0.248 | 0.235 | – |

**Table S3. Morphological dataset for the analyzed polynoids in this study.**

– means no character for this species, ? means unknown character due to lack of morphological description, Ch means character.

| Species | Ch1 | Ch2 | Ch3 | Ch4 | Ch5 | Ch6 | Ch7 | Ch8 | Ch9 | Ch10 | Ch11 |
| --- | --- | --- | --- | --- | --- | --- | --- | --- | --- | --- | --- |
| *Bathykurila guaymasensis* | 0 | 0 | 3 | 3 | 0 | 1 | – | 0 | 1 | 1 | 1 |
| *Branchinotogluma bipapillata* | 0 | 0 | 0 | 0 | 0 | 0 | 0 | 0 | 0 | 0 | 0 |
| *Branchinotogluma* cf. *sandersi* | ? | ? | ? | ? | ? | ? | ? | ? | ? | ? | ? |
| *Branchinotogluma elytropapillata* | 0 | 0 | 0 | 0 | 0 | 0 | 0 | 0 | 0 | 0 | 0 |
| *Branchinotogluma hessleri* | 0 | 0 | 0 | 0 | 0 | 0 | 0 | 0 | 0 | 0 | 0 |
| *Branchinotogluma japonicus* | 0 | 0 | 0 | 0 | 0 | 0 | 0 | 0 | 0 | 0 | ? |
| *Branchinotogluma marianus* | 0 | 0 | 0 | 0 | 0 | 0 | 0 | 0 | 0 | 0 | ? |
| *Branchinotogluma nanhaiensis* sp. nov. | 0 | 0 | 0 | 0 | 0 | 0 | 0 | 0 | 0 | 0 | 0 |
| *Branchinotogluma nikkoensis* | 0 | 0 | 0 | 0 | 0 | 0 | 0 | 0 | 0 | 0 | 1 |
| *Branchinotogluma ovata* | 0 | 0 | 0 | 0 | 0 | 0 | 0 | 0 | 0 | 0 | 0 |
| *Branchinotogluma pettiboneae* | 0 | 0 | 0 | 0 | 0 | 0 | 0 | 0 | 0 | 0 | 0 |
| *Branchinotogluma robusta* sp. nov. | 0 | 0 | 0 | 0 | 0 | 0 | 0 | 0 | 0 | 0 | 0 |
| *Branchinotogluma sagamiensis* | 0 | 0 | 0 | 0 | 0 | 0 | 0 | 0 | 0 | 0 | 1 |
| *Branchinotogluma sandersi* | 1 | 0 | 0 | 0 | 0 | 0 | 0 | 0 | 0 | 0 | 0 |
| *Branchinotogluma segonzaci* | 1 | 1 | 0 | 0 | 0 | 0 | 0 | 0 | 0 | 0 | 1 |
| *Branchinotogluma trifurcus* | 1 | 2 | 0 | 0 | 0 | 0 | 0 | 0 | 0 | 0 | 0 |
| *Branchinotogluma tunnicliffeae* | 0 | 0 | 0 | 0 | 0 | 0 | 0 | 0 | 0 | 0 | ? |
| *Branchiplicatus cupreus* | 2 | 2 | 2 | 2 | 0 | 0 | 2 | 1 | – | 1 | 1 |
| *Branchipolynoe eliseae* | 0 | 0 | 0 | 0 | 1 | 0 | 0 | 0 | 0 | 1 | 0 |
| *Branchipolynoe halliseyae* | 0 | 0 | 0 | 0 | 1 | 0 | 0 | 0 | 0 | 1 | 0 |
| *Branchipolynoe kajsae* | 0 | 0 | 0 | 0 | 1 | 0 | 0 | 0 | 0 | 1 | 0 |
| *Branchipolynoe longqiensis* | 0 | 0 | 0 | 0 | 1 | 0 | 0 | 0 | 0 | 1 | 0 |
| *Branchipolynoe meridae* | 0 | 0 | 0 | 0 | 1 | 0 | 0 | 0 | 0 | 1 | 0 |
| *Branchipolynoe pettiboneae* | 0 | 0 | 0 | 0 | 1 | 0 | 0 | 0 | 0 | 1 | 0 |
| *Branchipolynoe seepensis* | 0 | 0 | 0 | 0 | 1 | 0 | 0 | 0 | 0 | 1 | 0 |
| *Branchipolynoe symmytilida* | 0 | 0 | 0 | 0 | 1 | 0 | 0 | 0 | 0 | 1 | 0 |
| *Branchipolynoe tjiasmantoi* | 0 | 0 | 0 | 0 | 1 | 0 | 0 | 0 | 0 | 1 | 0 |
| *Halosydnella australis* | – | 0 | 2 | 2 | 0 | 1 | – | 1 | – | 1 | 1 |
| *Harmothoe impar* | 0 | 0 | 2 | 2 | 0 | 1 | – | 1 | – | 1 | 1 |
| *Lepidonotopodium fimbriatum* | 0 | 0 | 1 | 1 | 0 | 1 | – | 0 | 1 | 1 | 1 |
| *Lepidonotopodium okinawae* | 0 | 0 | 1 | 1 | 0 | 1 | – | 0 | 1 | 1 | 1 |
| *Lepidonotopodium* sp. n. | ? | ? | ? | ? | ? | ? | ? | ? | ? | ? | ? |
| *Lepidonotopodium williamsae* | 1 | 0 | 1 | 1 | 0 | 1 | – | 0 | 1 | 1 | 1 |
| *Lepidonotus clava* | – | 0 | 1 | 2 | 0 | 1 | – | 1 | – | 1 | 1 |
| *Levensteiniella iris* | 0 | 0 | 1 | 1 | 0 | 1 | – | 0 | 1 | 1 | 1 |
| *Levensteiniella manusensis* | 0 | 0 | 1 | 1 | 0 | 1 | – | 0 | 1 | 1 | 1 |
| *Levensteiniella undomarginata* | 0 | 0 | 1 | 1 | 0 | 1 | – | 0 | 1 | 1 | 1 |
| *Peinaleopolynoe elvisi* | 0 | 0 | 0 | 0 | 0 | 0 | 0 | 0 | 0 | 0 | ? |
| *Peinaleopolynoe goffrediae* | 0 | 0 | 0 | 0 | 0 | 0 | 0 | 0 | 0 | 0 | ? |
| *Peinaleopolynoe mineoi* | 0 | 0 | 0 | 0 | 0 | 0 | 0 | 0 | 0 | 1 | ? |
| *Peinaleopolynoe orphanae* | 0 | 0 | 0 | 0 | 0 | 0 | 0 | 0 | 0 | 1 | ? |
| *Peinaleopolynoe santacatalina* | 0 | 0 | 0 | 0 | 0 | 0 | 0 | 0 | 0 | 1 | ? |
| *Peinaleopolynoe sillardi* | 0 | 0 | 0 | 0 | 0 | 0 | 0 | 0 | 0 | 1 | ? |
| *Thermopolynoe branchiata* | 1 | 1 | 1 | 1 | 0 | 0 | 1 | 0 | 1 | 1 | 1 |
